# Supplementary material
Source: Elsevier journal article supplement (https://www.sciencedirect.com/science/article/pii/S2255553618300466)
Supplement: mmc1 [file S2255553618300466:mmc1.docx]

**Anexo 1 – Resumo do Risco de Viés dos Estudos com Seu Respectivo Resultado em Cada Item da Avaliação.**


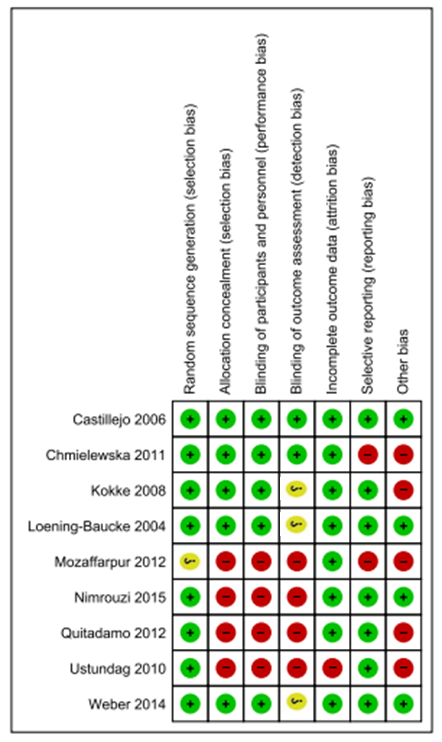


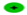
 = risco baixo de viés;
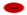
 = alto risco de viés;
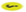
 = risco indeterminado de viés.
