# Supplementary material
Source: Elsevier journal article supplement (https://www.sciencedirect.com/science/article/pii/S2255553618300466)
Supplement: mmc2 [file S2255553618300466:mmc2.docx]

**Anexo 2 – Tabela de escore dos artigos selecionados na escala de Jadad.**

| **Artigo** | **Escore na Escala de Jadad** |
| --- | --- |
| **Castillejo 2006** | 5 |
| **Kokke 2008** | 4 |
| **Loening-Baucke 2004** | 4 |
| **Chmielewska 2011** | 5 |
| **Mozaffarpur 2012** | 1 |
| **Nimrouzi 2015** | 2 |
| **Quitadamo 2012** | 2 |
| **Ustundag 2010** | 2 |
| **Weber 2014** | 4 |
